# Supplementary material for: Simultaneous detection of BRCA mutations and large genomic rearrangements in germline DNA and FFPE tumor samples
Source: PubMed Central journal article supplement (PMC5308695; doi:10.18632/oncotarget.11259), 2016-08-12
Supplement: oncotarget-07-61845-s001.pdf [file oncotarget-07-61845-s001.pdf]

## Simultaneous detection of *BRCA* mutations and large genomic rearrangements in germline DNA and FFPE tumor samples

### SUPPLEMENTARY TABLES AND FIGURES

Supplementary Table S1: Reproducibility of large InDel detection

|                      | c.3481_3491delGAAGATACTAG |         | c.1175_1214del40 |         |
|----------------------|---------------------------|---------|------------------|---------|
|                      | NGS1                      | NGS2    | NGS1             | NGS2    |
| Sequencing run       | NGS1                      | NGS2    | NGS1             | NGS2    |
| Mapped reads         | 127,591                   | 140,112 | 165,866          | 153,689 |
| Average coverage     | 105.1x                    | 160.5x  | 196.9x           | 485.2x  |
| Coverage at position | 303x                      | 435x    | 334x             | 660x    |
| VAF                  | 36.30%                    | 35.40%  | 53.89%           | 47.42%  |

**Supplementary Table S2: Variant allele frequencies of tumour and matched normal DNA pairs resulting from Illumina MiSeq NGS sequencing**

See Supplementary File 1

**Supplementary Table S3: Detection of variant allele frequencies in serial mixture of mutant and non-mutant FFPE DNA samples**

| <b>Variant</b>           | <b>Dilution</b> | <b>Expected variant allele proportion*</b> | <b>Observed variant allele proportion</b> | <b>Coverage</b> |
|--------------------------|-----------------|--------------------------------------------|-------------------------------------------|-----------------|
| <b>BRCA1: c.5382insC</b> | 1/2             | 38.55%                                     | 30%                                       | 2552            |
|                          | 1/4             | 19.27%                                     | 10.78%                                    | 1776            |
|                          | 1/8             | 9.63%                                      | 3.92%**                                   | 3492            |
|                          | 1/16            | 4.81%                                      | 2.70%**                                   | 2552            |

\* Expected frequency was based on results from the first sequencing run where the samples were undiluted

\*\*Detected after visual inspection of filtered variants

Supplementary Table S4: Case examples for the HP percentage variant filter decision algorithm

| Case | Variant | Sample | Data-base  | DB%OE | DB%    | HP Opposite (DB%OE-S%OE) | HP% (S%+HP Opposite) | HP% - DB% | (HP% - DB%) / DB%*100 | Filter outcome |
|------|---------|--------|------------|-------|--------|--------------------------|----------------------|-----------|-----------------------|----------------|
| a.   | 1       | 28%    | 10%        |       |        |                          |                      |           |                       |                |
|      | 0       | 73%    | 85%        | 3%<5% |        |                          |                      |           |                       | True variant   |
|      | -1      | 2%     | <b>3%</b>  |       |        |                          |                      |           |                       |                |
| b.   | 1       | 35%    | 9%         |       |        |                          |                      |           |                       |                |
|      | 0       | 65%    | 85%        | 8%>5  | 9%<10  | 3%                       | 38%                  | 29%>25%   |                       | True variant   |
|      | -1      | 5%     | <b>8%</b>  |       |        |                          |                      |           |                       |                |
| c.   | 1       | 30%    | 9%         |       |        |                          |                      |           |                       |                |
|      | 0       | 65%    | 85%        | 8%>5  | 9%<10  | -4%                      | 26%                  | 17%<25%   |                       | False variant  |
|      | -1      | 12%    | <b>8%</b>  |       |        |                          |                      |           |                       |                |
| d.   | 1       | 25%    | 20%        |       |        |                          |                      |           |                       |                |
|      | 0       | 73%    | 85%        | 10%>5 | 20%<10 | 3%                       | 28%                  |           | 40%<25%               | True variant   |
|      | -1      | 7%     | <b>10%</b> |       |        |                          |                      |           |                       |                |
| e.   | 1       | 18%    | 20%        |       |        |                          |                      |           |                       |                |
|      | 0       | 73%    | 85%        | 10%>5 | 20%<10 | 13%                      | 21%                  |           | 5%<25%                | False variant  |
|      | -1      | 7%     | <b>10%</b> |       |        |                          |                      |           |                       |                |

+1 is one nucleotide insertion, 0 is Wt, -1 is one nucleotide deletion (Opposite Event – OE). For other abbreviations see Supp. Figure S1.

HP percentage filter here is tested against the insertion events of the sample (black frame).

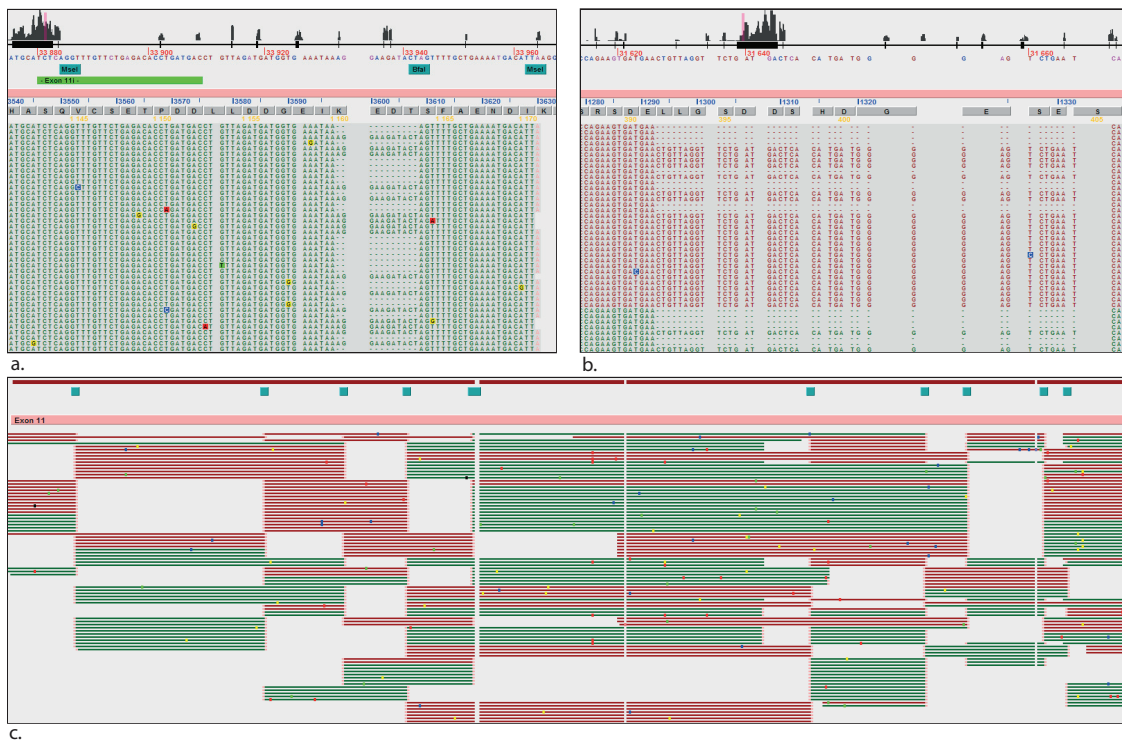

**Supplementary Figure S1: Graphic report of mapped reads generated by the NGS Explorer.** **a.** *BRCA1* c.3481\_3491delGAAGATACTAG variant from sample GM14096. Green sequences represent the forward reads. Letters with coloured backgrounds mark the mismatches in the reads. The thick green line shows the position of forward primer used in the amplification of target sequences. **b.** *BRCA1* c.1175-1214del40 variant from sample NA14094. Red sequences represent the reverse reads. **c.** An overview of the coverage generated by overlapping restriction fragments at exon 11 of *BRCA2* in sample NA13712 in NGS Explorer. Green lines represent forward, red lines represent reverse reads. Each line is a group of the reads with the same sequence. Coloured squares are the mismatches and insertion present in the reads.

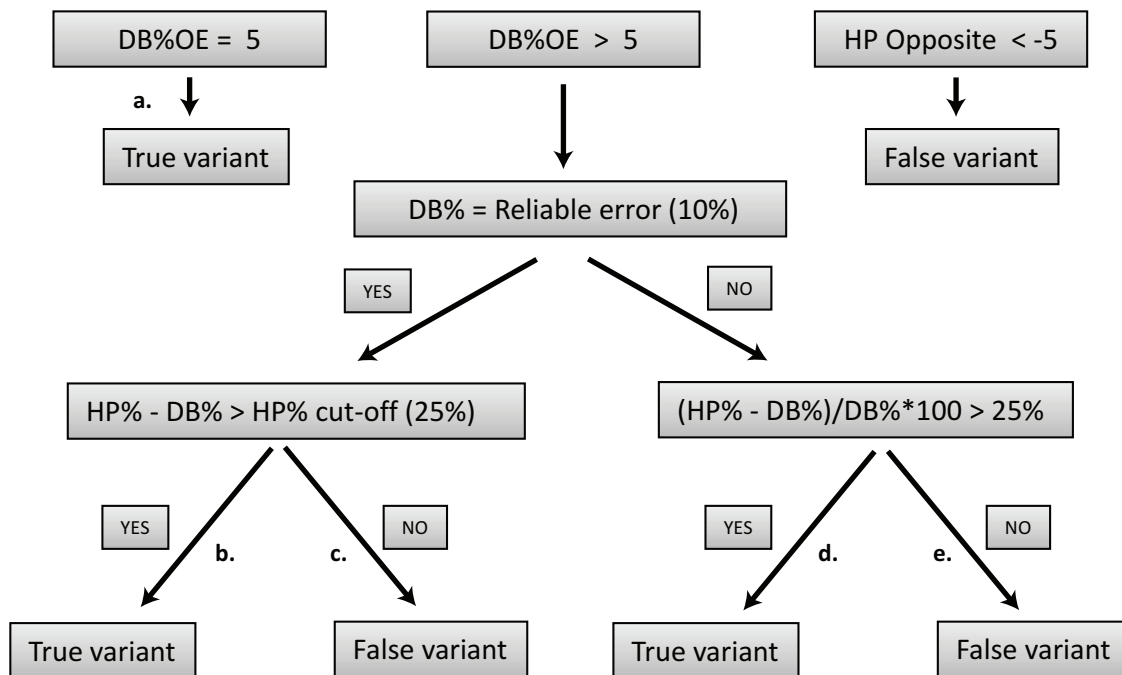

**Supplementary Figure S2: Decision algorithm for the HP percentage (HP%) variant filter.** HP Opposite=DB%OE-S%OE; HP%=S%+HP Opposite. Abbreviations: DB%: percentage of the variant in the database, DB%OE: percentage of the opposite event in the database, S%: percentage of the variant in the sample, S%OE: percentage of the opposite event in the sample.
